# Supplementary material
Source: MDPI journal article supplement (https://www.mdpi.com/2073-4441/15/10/1902)
Supplement: s1 [file s1]

## Supplementary Materials

**Table S1.** Initial concentrations of Cu, Zn, Cd and Cr in authentic copper and gold tailing leachates.

| Real leachates | Metal concentrations (mg L <sup>-1</sup> ) |            |           |            |
|----------------|--------------------------------------------|------------|-----------|------------|
|                | Cu                                         | Zn         | Cd        | Cr         |
| Gold tailing   | 8.53±0.12                                  | 8.66±0.19  | 0.4±0.11  | 43.58±1.63 |
| Copper tailing | 140.5±2.31                                 | 138.9±2.42 | 6.25±0.64 | 1.9±0.21   |

**Table S2.** Theoretical equilibrium concentrations of different trace metals at pH of 8.5, which were calculated based on solubility product constant ( $K_{sp}$ ).

| metal hydroxide     | $K_{sp}$              | $[M^{n+}](\text{mol L}^{-1})$ | $C[M^{n+}](\text{mg L}^{-1})$ |
|---------------------|-----------------------|-------------------------------|-------------------------------|
| Cu(OH) <sub>2</sub> | $2.2 \times 10^{-20}$ | $2.2 \times 10^{-9}$          | $1.40 \times 10^{-4}$         |
| Cd(OH) <sub>2</sub> | $2.5 \times 10^{-14}$ | $2.5 \times 10^{-3}$          | 281                           |
| Zn(OH) <sub>2</sub> | $1.2 \times 10^{-17}$ | $1.2 \times 10^{-6}$          | $78.5 \times 10^{-2}$         |
| Cr(OH) <sub>3</sub> | $6.3 \times 10^{-31}$ | $2.0 \times 10^{-14}$         | $1.04 \times 10^{-9}$         |

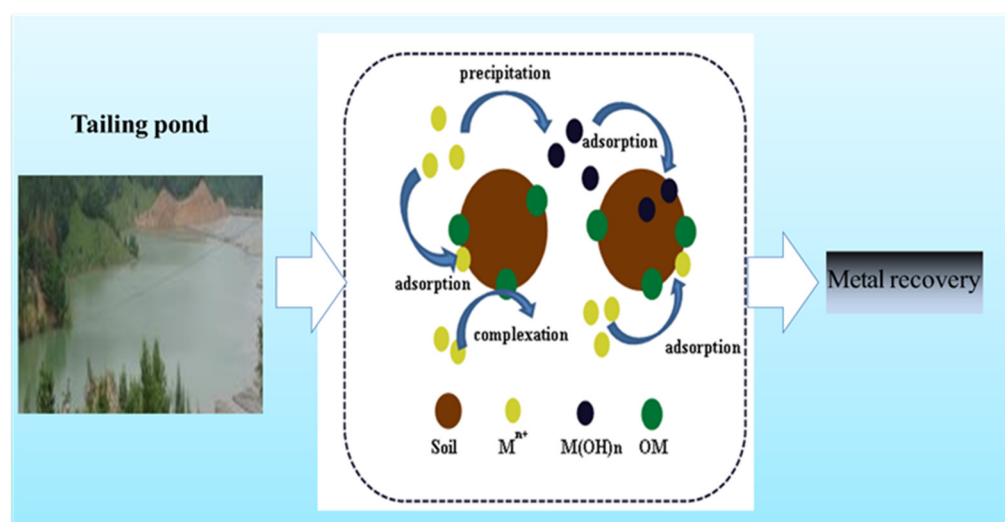

**Figure S1.** The flow chart of the alkali suspension method.

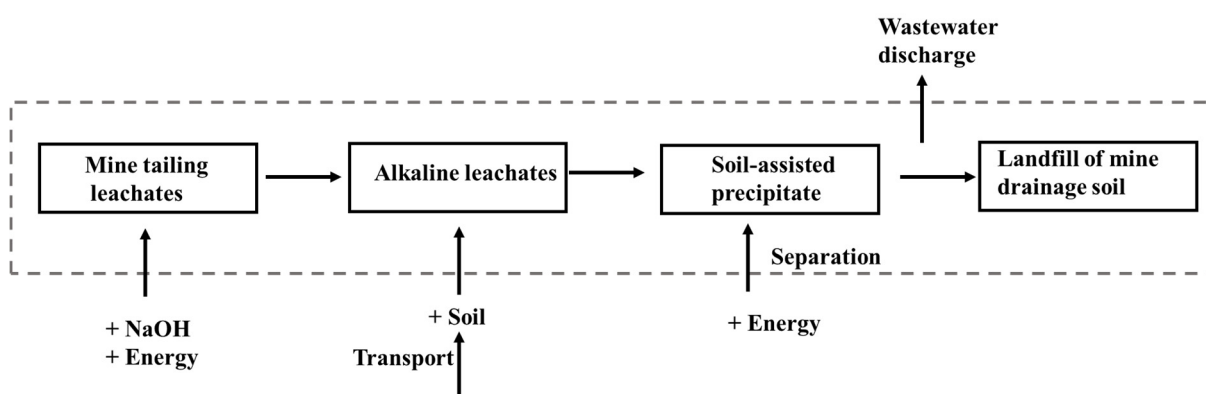

**Figure S2.** General system boundaries for tailing leachates treatment through alkali suspension method.

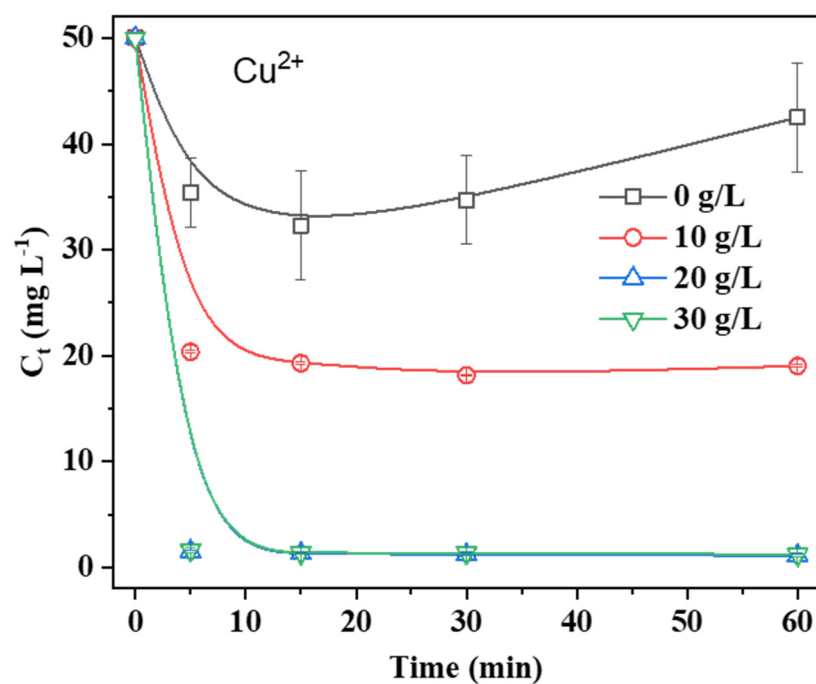

Figure S3. Effect of different soil concentrations on the  $\text{Cu}^{2+}$  during the reaction.

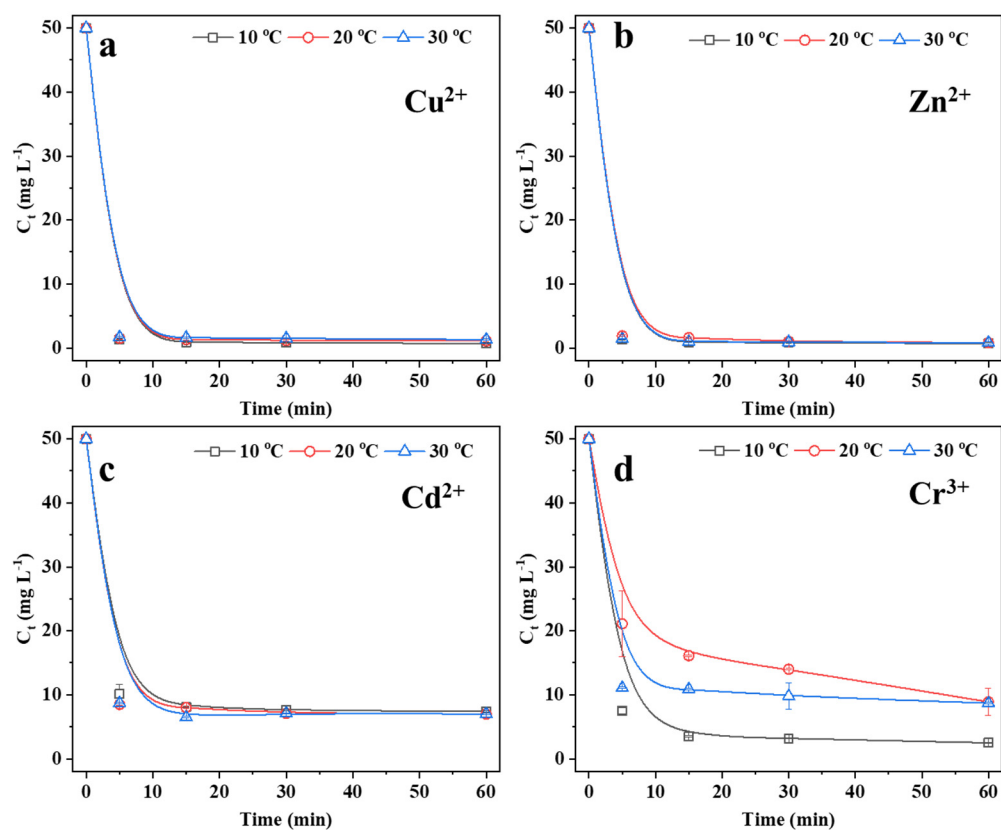

Figure S4. Concentration-time curves of (a) Cu, (b) Zn, (c) Cd and (d) Cr at 10, 20 and 30 °C.

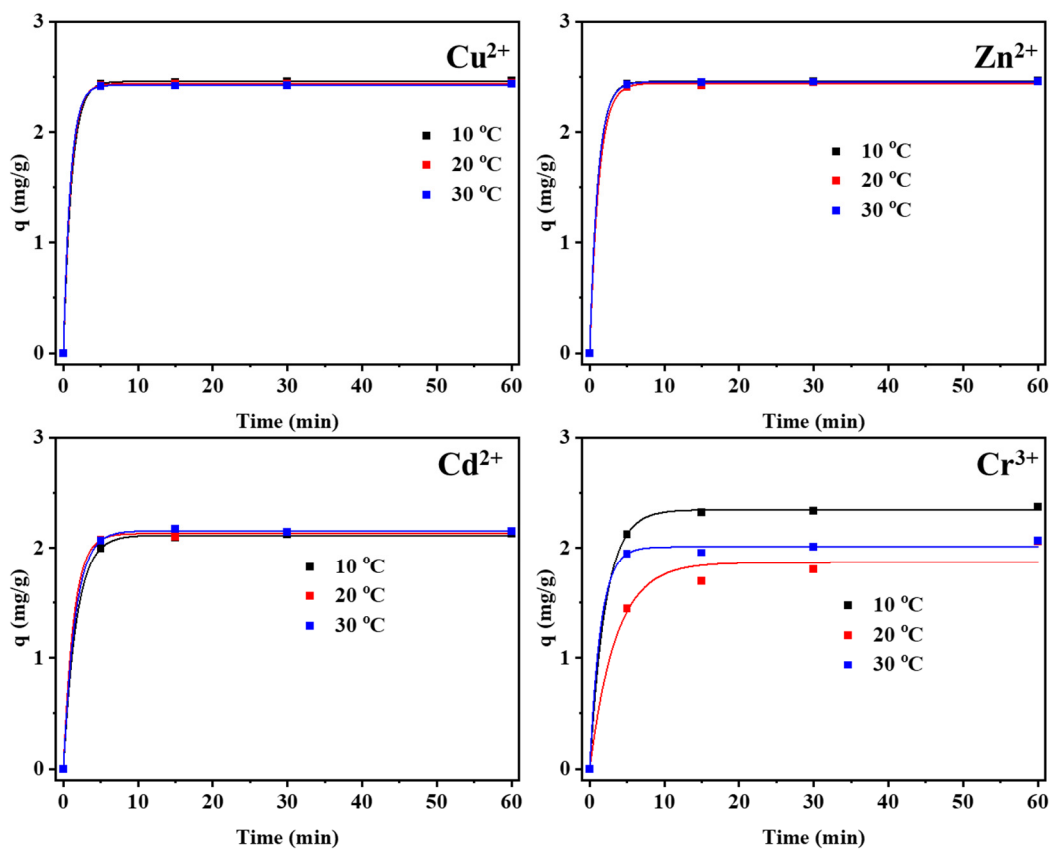

**Figure S5.** The pseudo-first-order kinetics model of trace metal removal in the alkali-soil system.

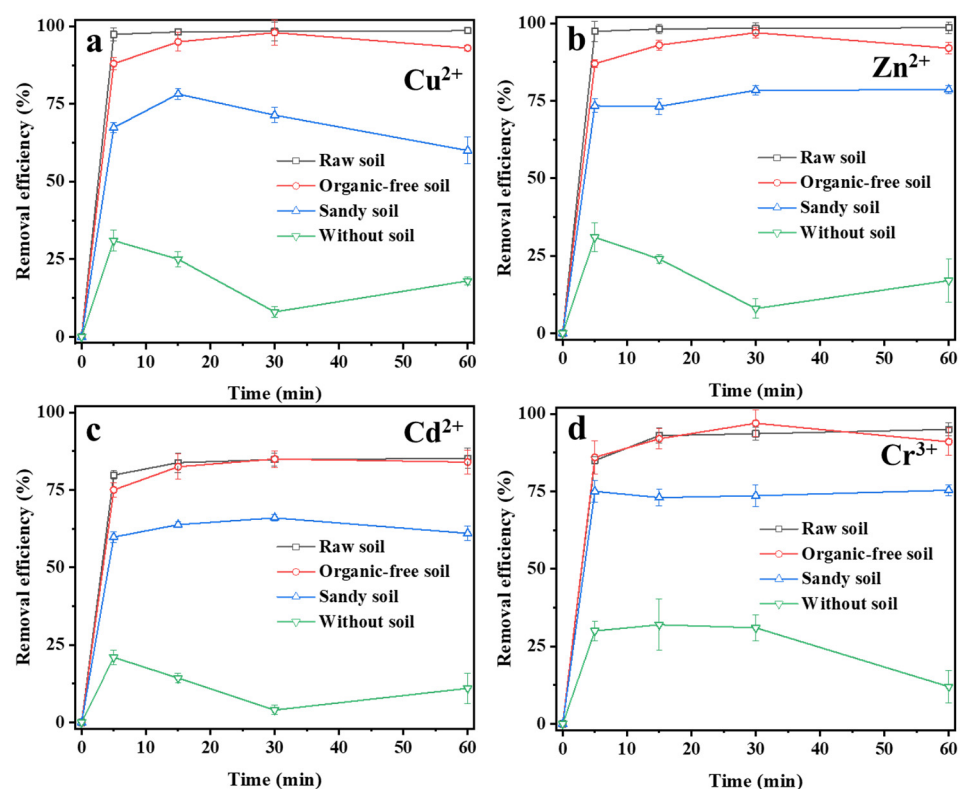

**Figure S6.** Removal efficiencies of trace metals in solutions treated with raw soil, organic-free soil, sandy soil, and without soil. The pH of the synthetic leachate was adjusted to 8.5.
